# Supplementary material for: A unified computational model for cortical post-synaptic plasticity
Source: eLife journal article supplement (doi:10.7554/elife.55714), 2020-07-30
Supplement: supp [file elife_poa_e55714_Figure_9_figure_supplement_7.pdf › elife_poa_e55714_Figure_9_figure_supplement_7.pdf]

Data set PFC-3, Zhou et al. 2013, 228 parameter sets

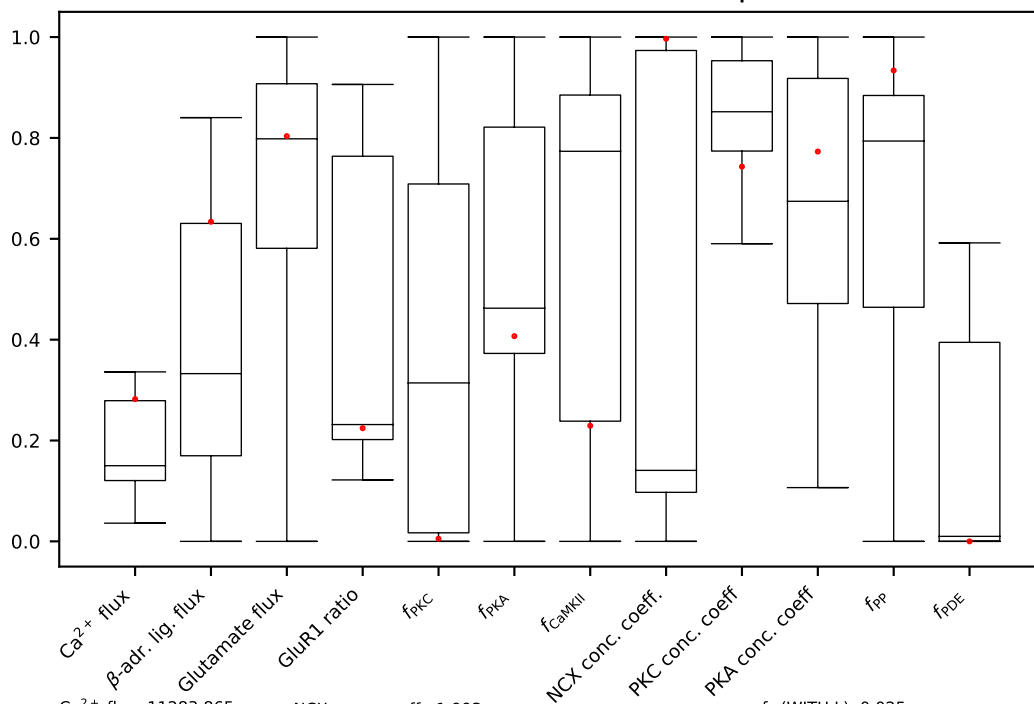

$\text{Ca}^{2+}$  flux: 11283.865  
 $\beta$ -adr. lig. flux: 3.169  
 Glutamate flux: 160.720  
 GluR1 ratio: 0.224  
 $f_{\text{PKC}}$ : 0.011  
 $f_{\text{PKA}}$ : 0.814  
 $f_{\text{CaMKII}}$ : 0.459

NCX conc. coeff.: 1.993  
 PKC conc. coeff: 3.715  
 PKA conc. coeff: 1.546  
 $f_{\text{PP}}$ : 1.868  
 $f_{\text{PDE}}$ : 0.000

$f_0$  (WITH L): 0.025  
 $f_1$  (WITHOUT L): 0.053
