# Supplementary figures and images for: A unified computational model for cortical post-synaptic plasticity
Source: eLife journal article supplement (doi:10.7554/elife.55714), 2020-07-30

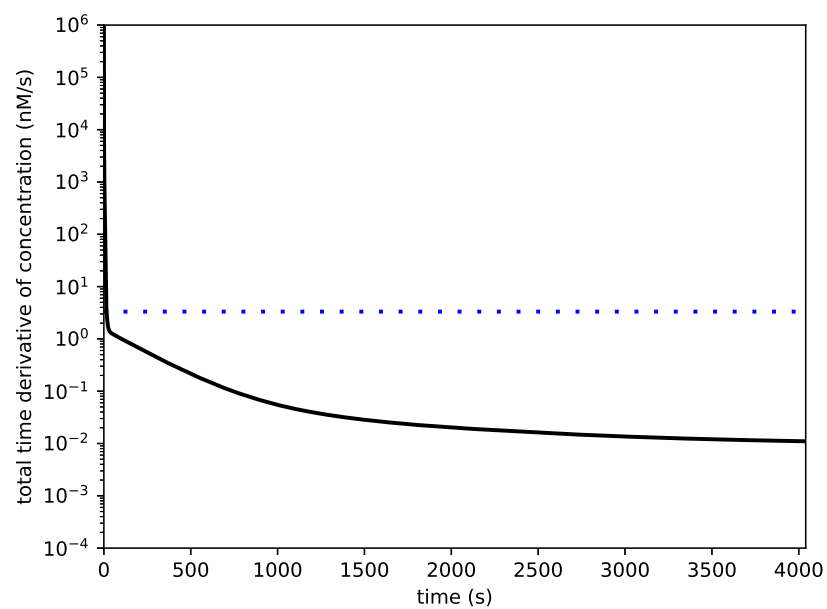

Supplement: supp [file elife_poa_e55714_Figure_11_figure_supplement_1.pdf › elife_poa_e55714_Figure_11_figure_supplement_1.pdf]

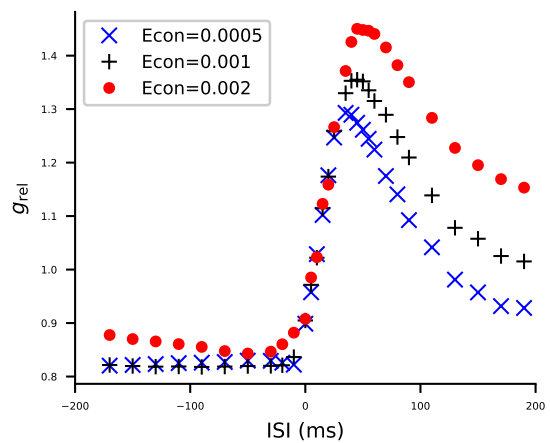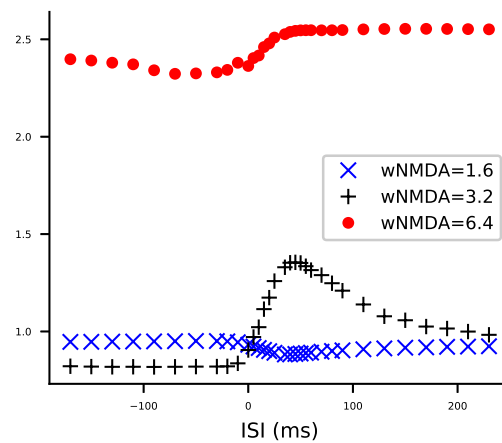

Supplement: supp [file elife_poa_e55714_Figure_11_figure_supplement_2.pdf › elife_poa_e55714_Figure_11_figure_supplement_2.pdf]

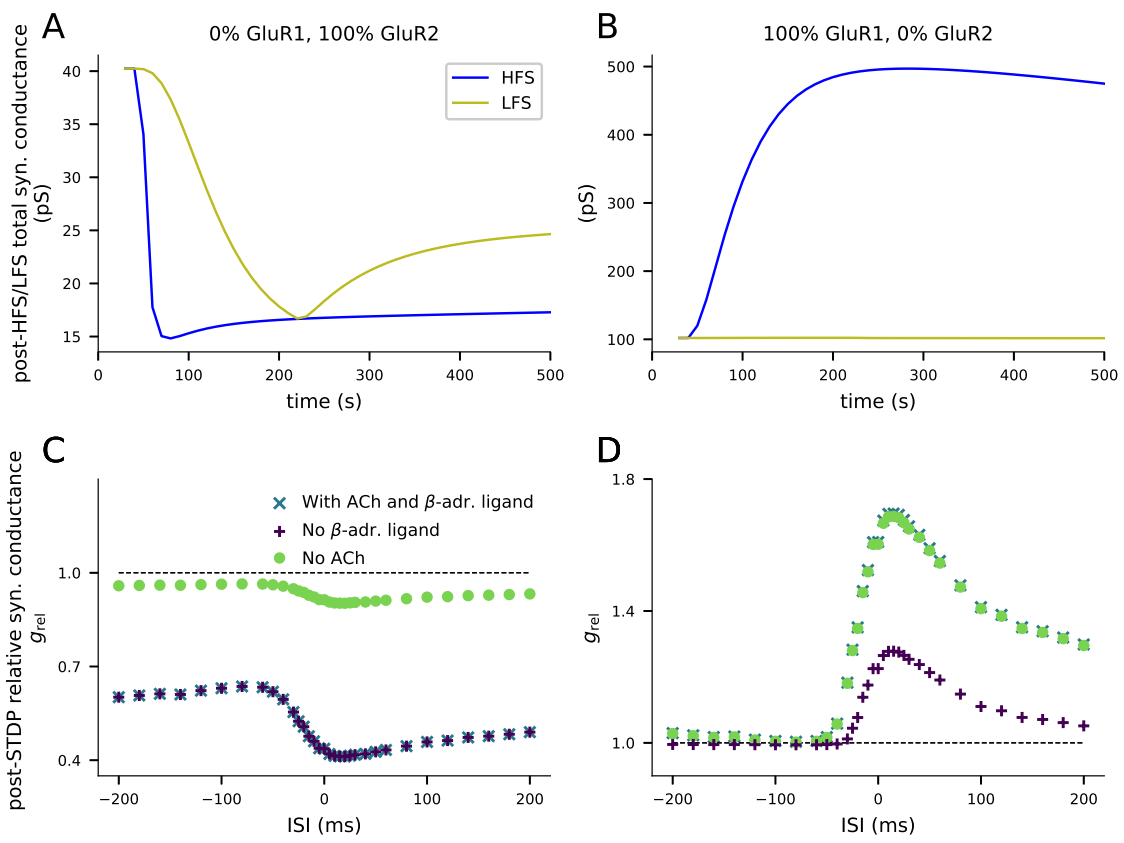

Supplement: supp [file elife_poa_e55714_Figure_3_figure_supplement_1.pdf › elife_poa_e55714_Figure_3_figure_supplement_1.pdf]

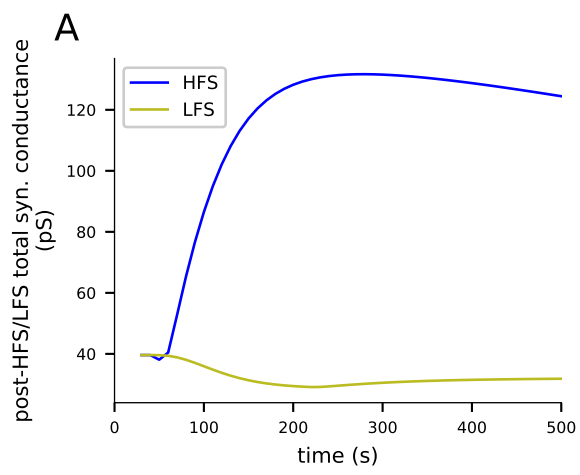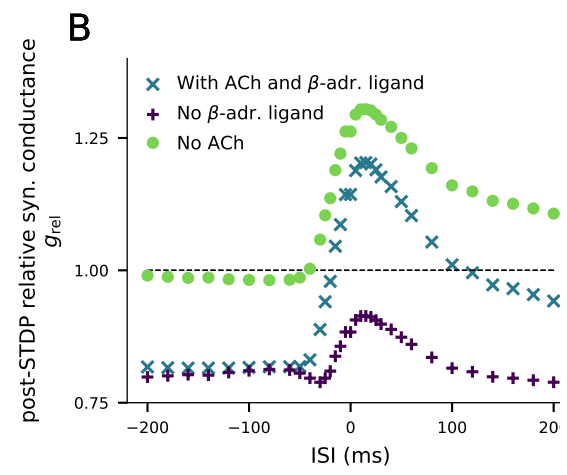

Supplement: supp [file elife_poa_e55714_Figure_3_figure_supplement_2.pdf › elife_poa_e55714_Figure_3_figure_supplement_2.pdf]

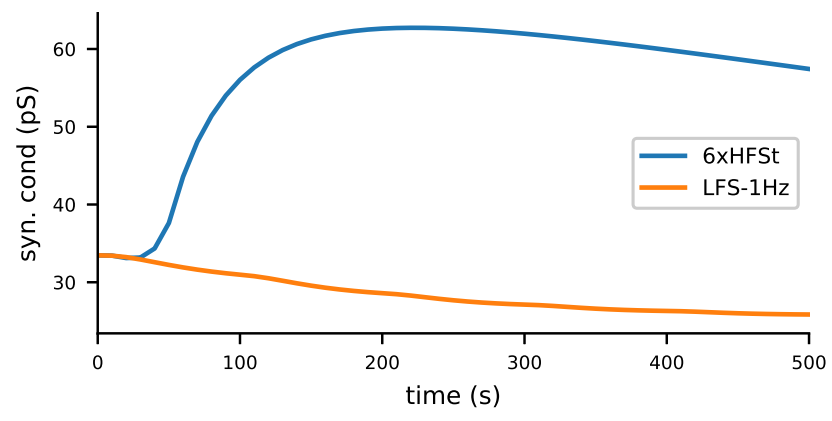

Supplement: supp [file elife_poa_e55714_Figure_3_figure_supplement_3.pdf › elife_poa_e55714_Figure_3_figure_supplement_3.pdf]

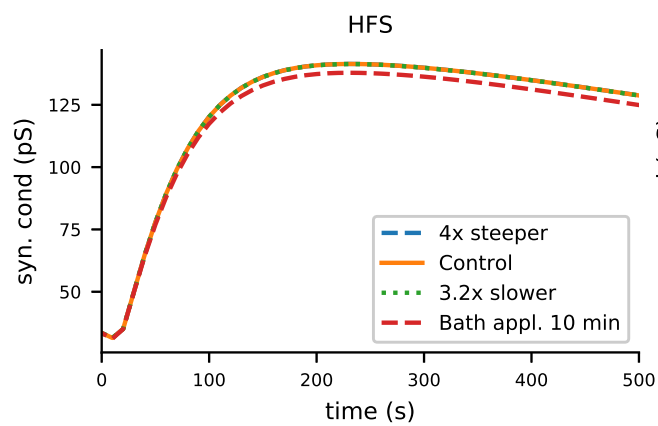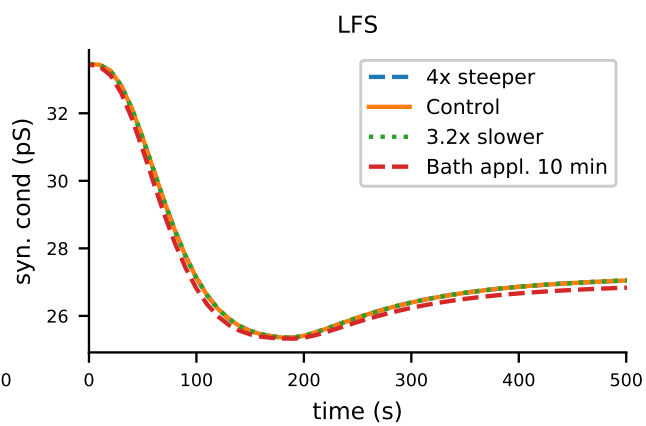

Supplement: supp [file elife_poa_e55714_Figure_3_figure_supplement_4.pdf › elife_poa_e55714_Figure_3_figure_supplement_4.pdf]

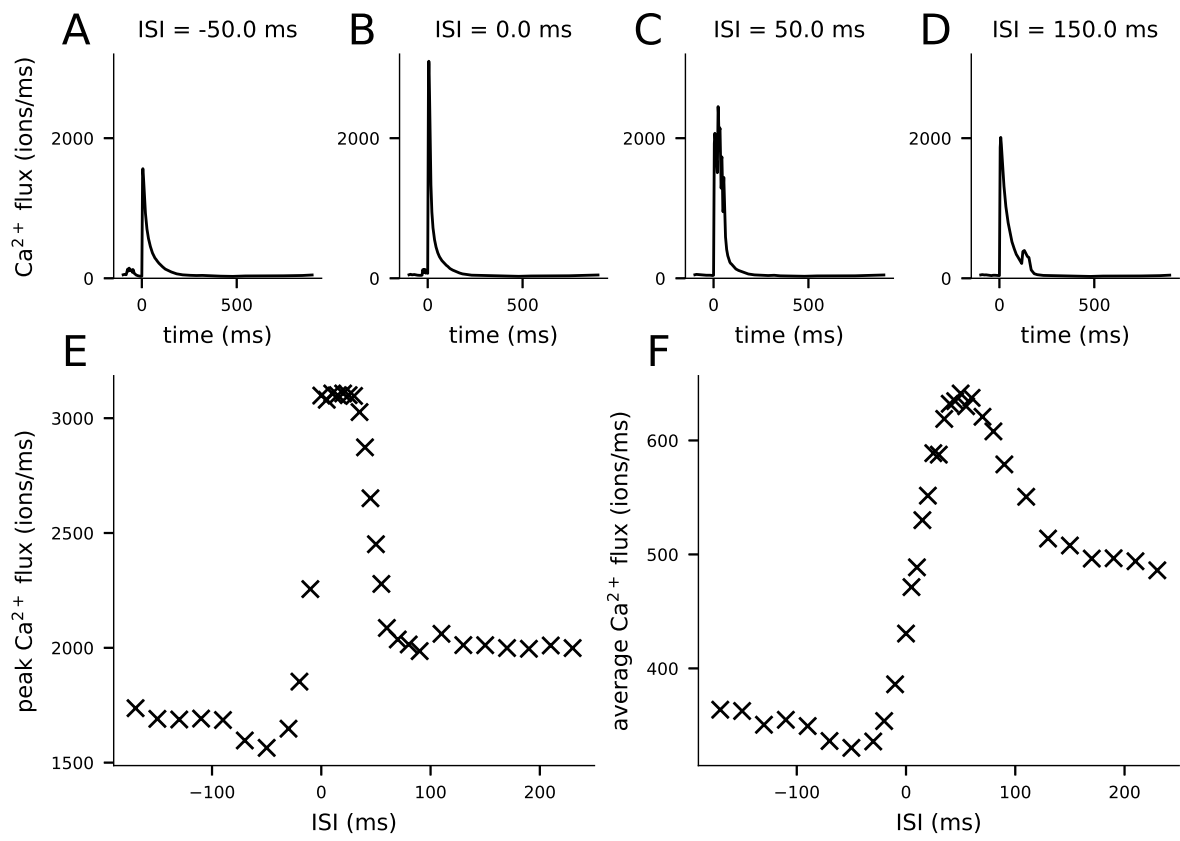

Supplement: supp [file elife_poa_e55714_Figure_5_figure_supplement_1.pdf › elife_poa_e55714_Figure_5_figure_supplement_1.pdf]

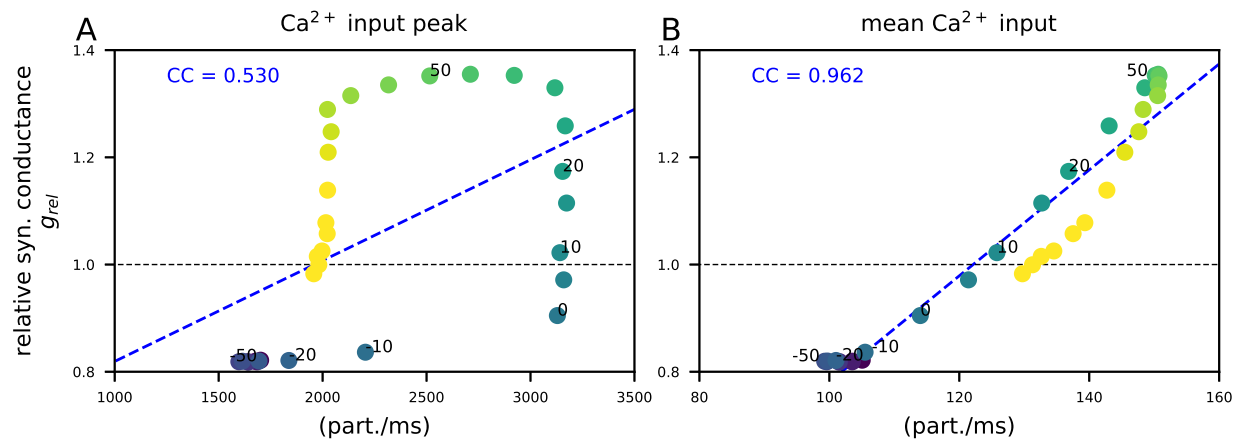

Supplement: supp [file elife_poa_e55714_Figure_6_figure_supplement_1.pdf › elife_poa_e55714_Figure_6_figure_supplement_1.pdf]

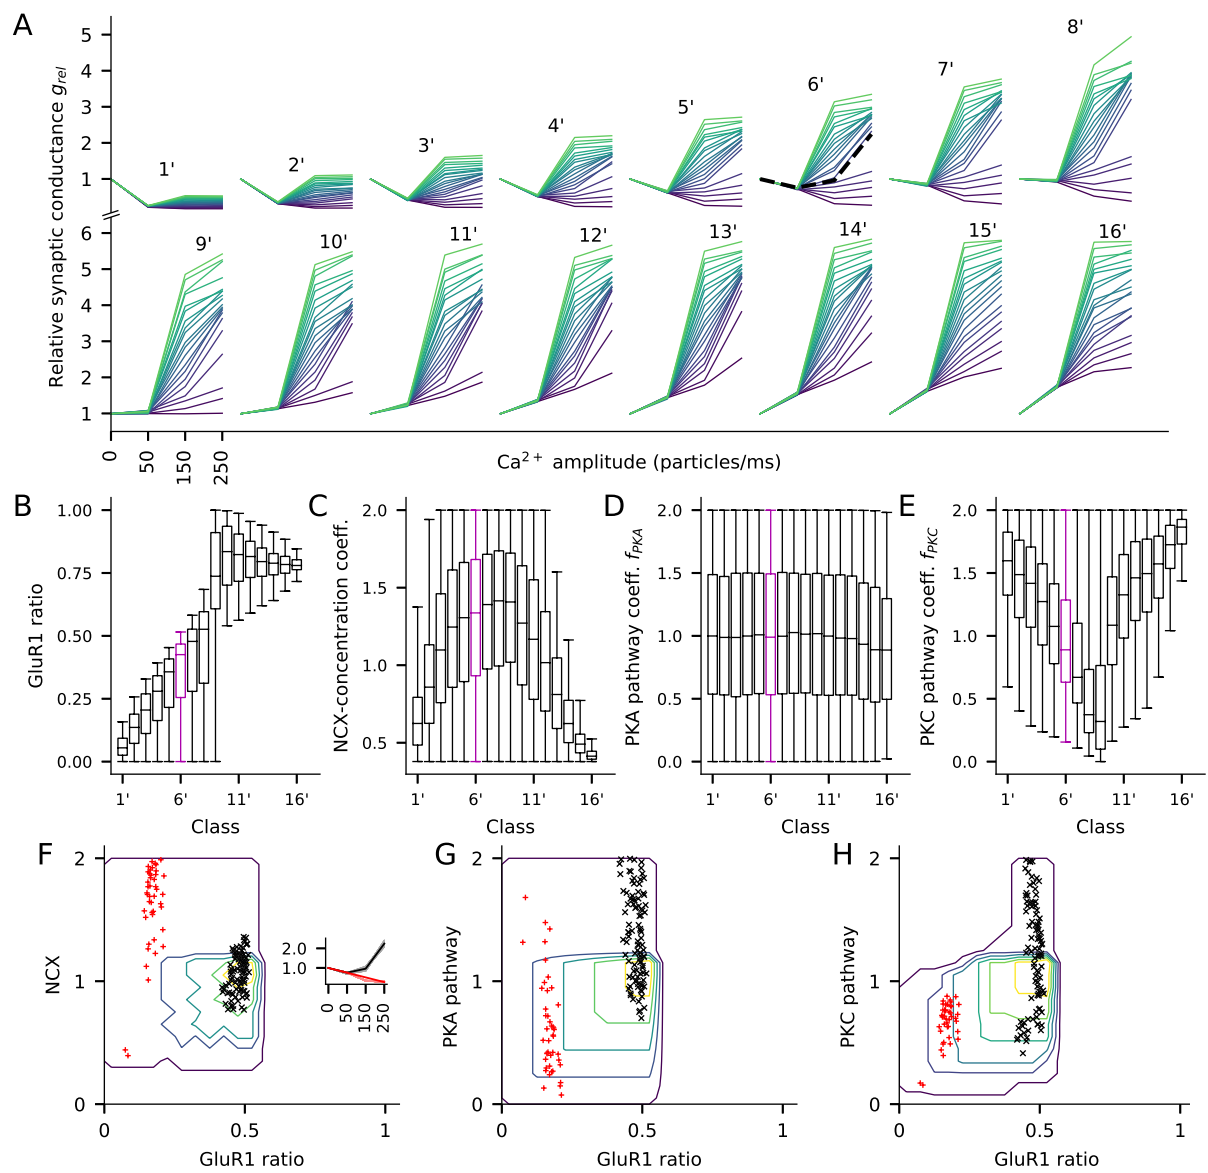

Supplement: supp [file elife_poa_e55714_Figure_7_figure_supplement_1.pdf › elife_poa_e55714_Figure_7_figure_supplement_1.pdf]

Data set EC-1, Ma et al. 2008 (horizontal), 5 parameter sets

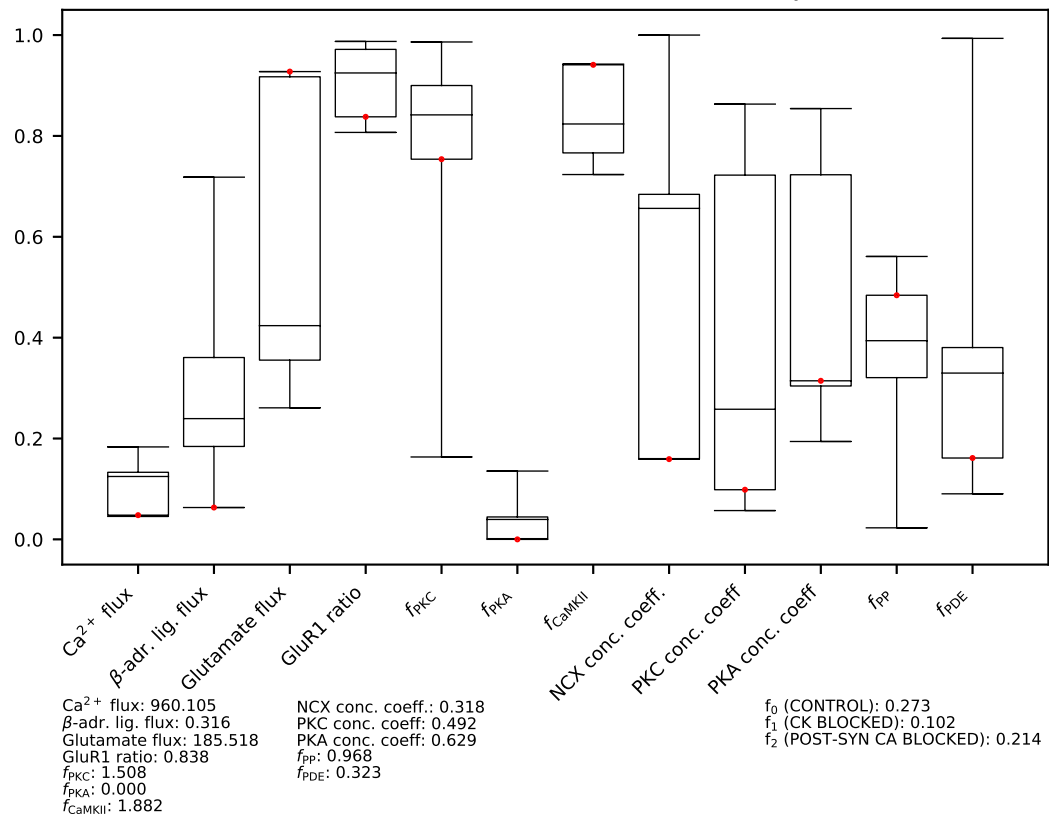

Supplement: supp [file elife_poa_e55714_Figure_9_figure_supplement_1.pdf › elife_poa_e55714_Figure_9_figure_supplement_1.pdf]

Data set AuC-1, Kotak et al. 2007 (LTP), 85 parameter sets

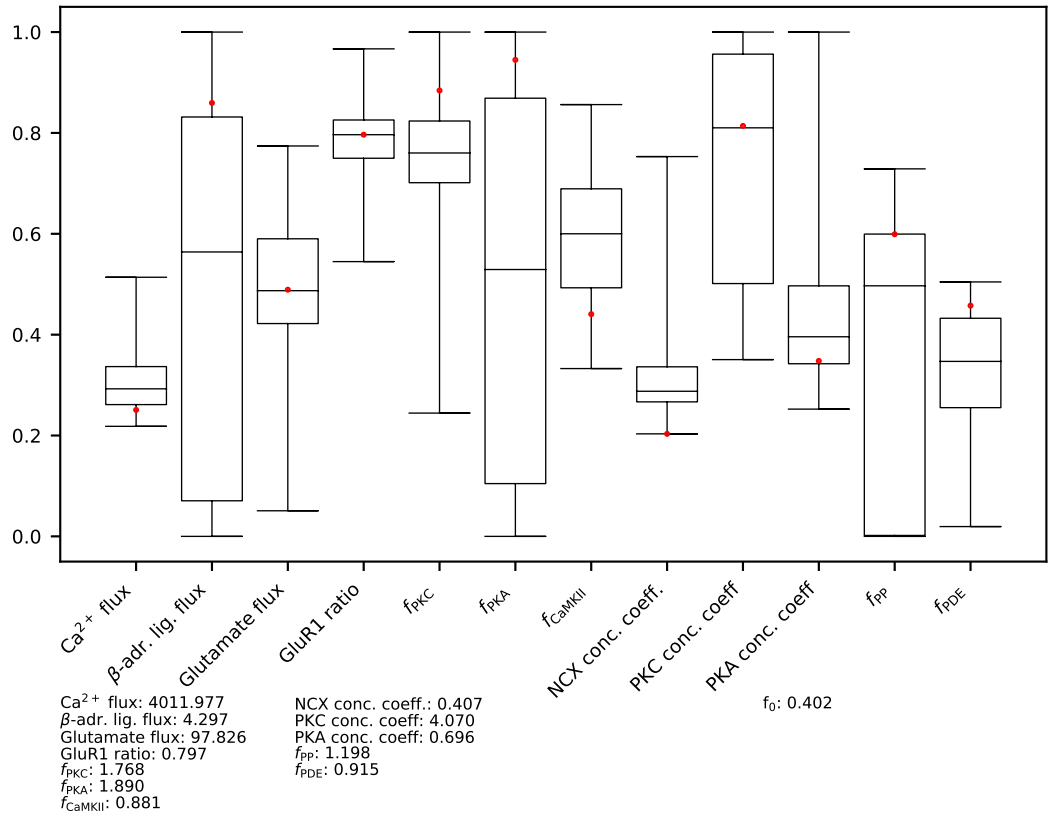

Supplement: supp [file elife_poa_e55714_Figure_9_figure_supplement_10.pdf › elife_poa_e55714_Figure_9_figure_supplement_10.pdf]

Data set AuC-2, Kotak et al. 2007 (LTD), 773 parameter sets

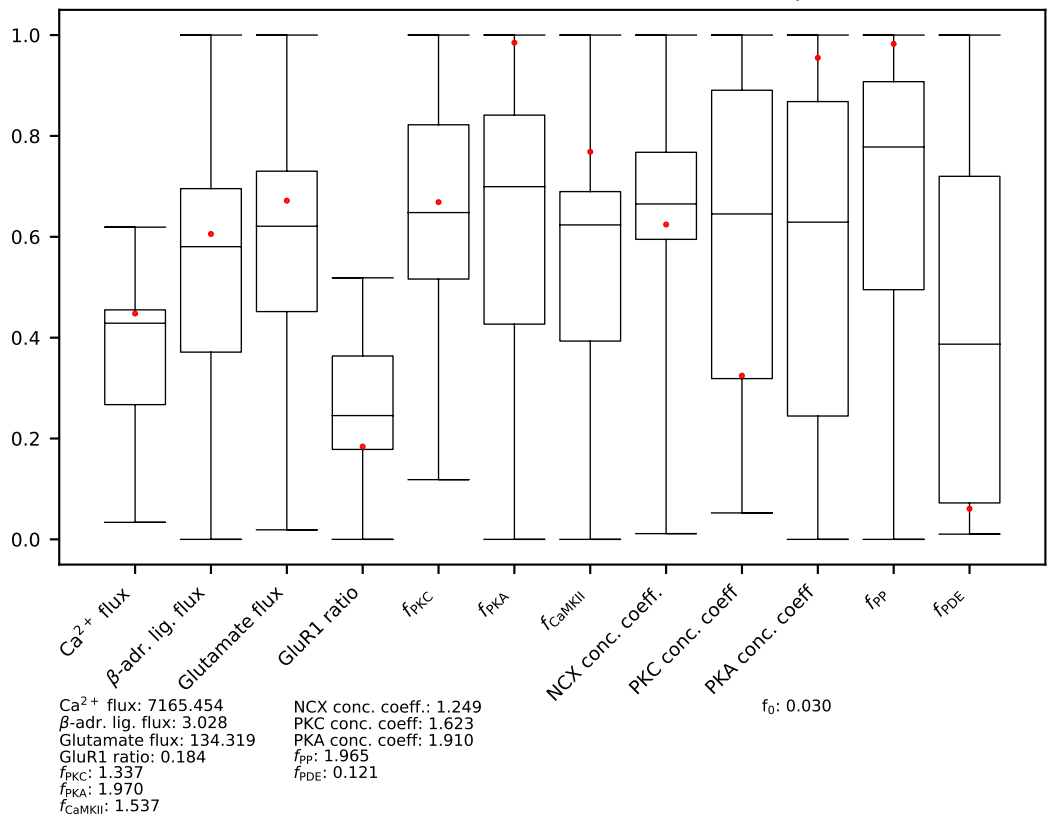

Supplement: supp [file elife_poa_e55714_Figure_9_figure_supplement_11.pdf › elife_poa_e55714_Figure_9_figure_supplement_11.pdf]

Data set EC-2, Ma et al. 2008 (ascending), 85 parameter sets

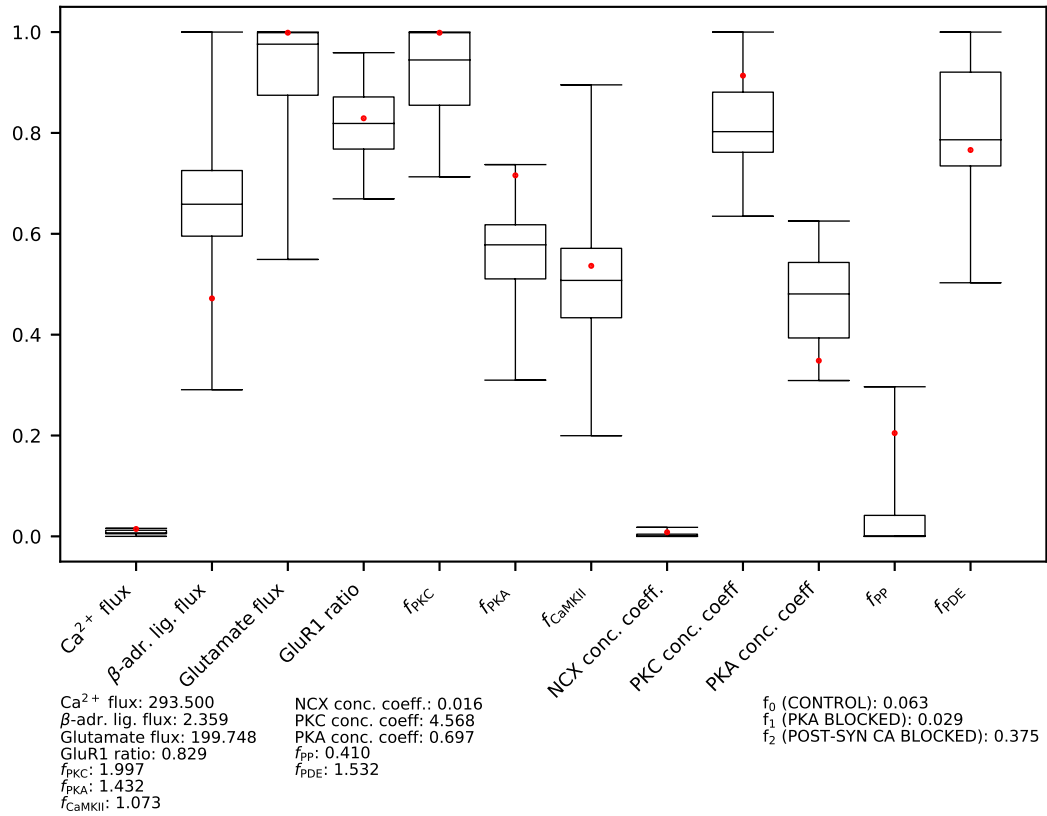

Supplement: supp [file elife_poa_e55714_Figure_9_figure_supplement_2.pdf › elife_poa_e55714_Figure_9_figure_supplement_2.pdf]

Data set PFC-1, Saez-Briones et al. 2015, 40 parameter sets

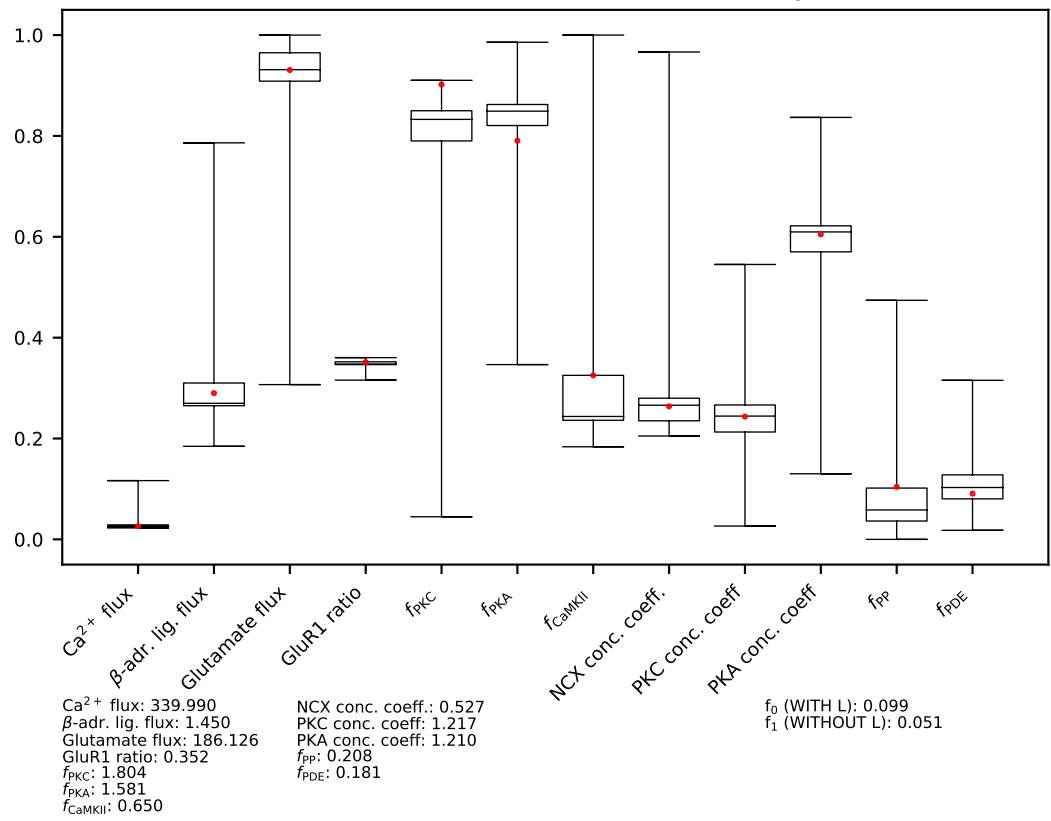

Supplement: supp [file elife_poa_e55714_Figure_9_figure_supplement_3.pdf › elife_poa_e55714_Figure_9_figure_supplement_3.pdf]

Data set PFC-2, Flores et al. 2011, 48 parameter sets

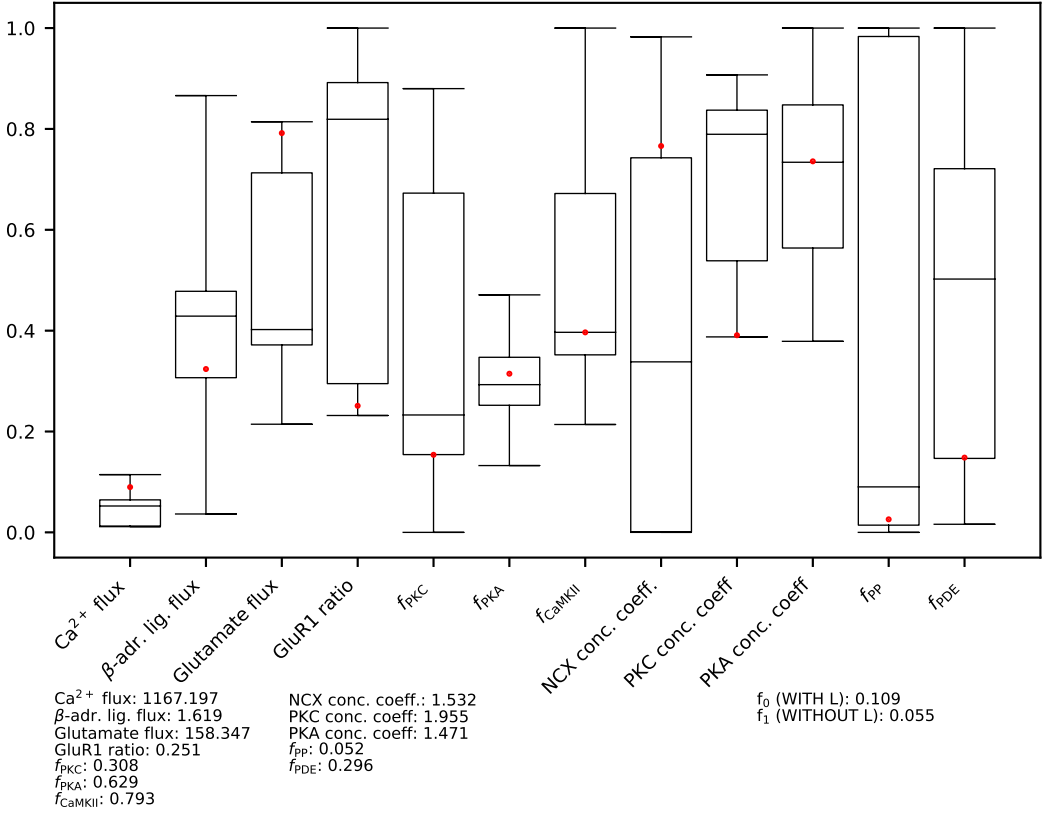

Supplement: supp [file elife_poa_e55714_Figure_9_figure_supplement_4.pdf › elife_poa_e55714_Figure_9_figure_supplement_4.pdf]

Data set BC, Hardingham et al. 2003, 31 parameter sets

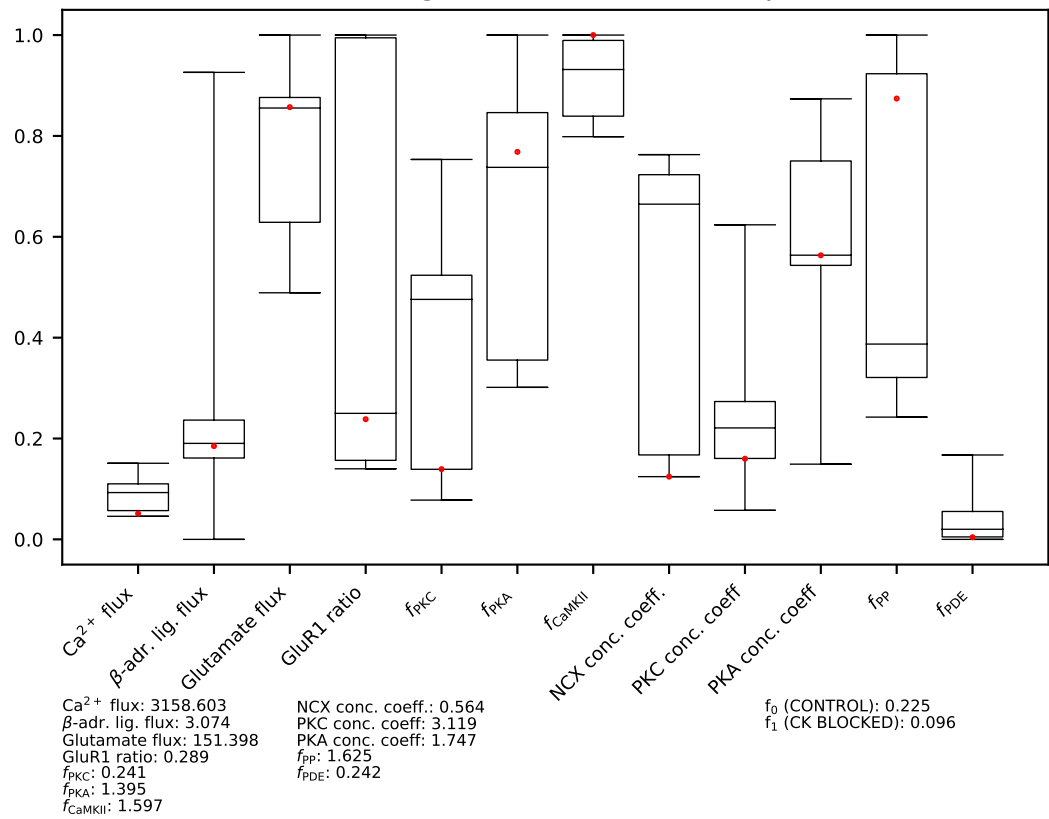

Supplement: supp [file elife_poa_e55714_Figure_9_figure_supplement_5.pdf › elife_poa_e55714_Figure_9_figure_supplement_5.pdf]

Data set ACC, Song et al. 2017, 100 parameter sets

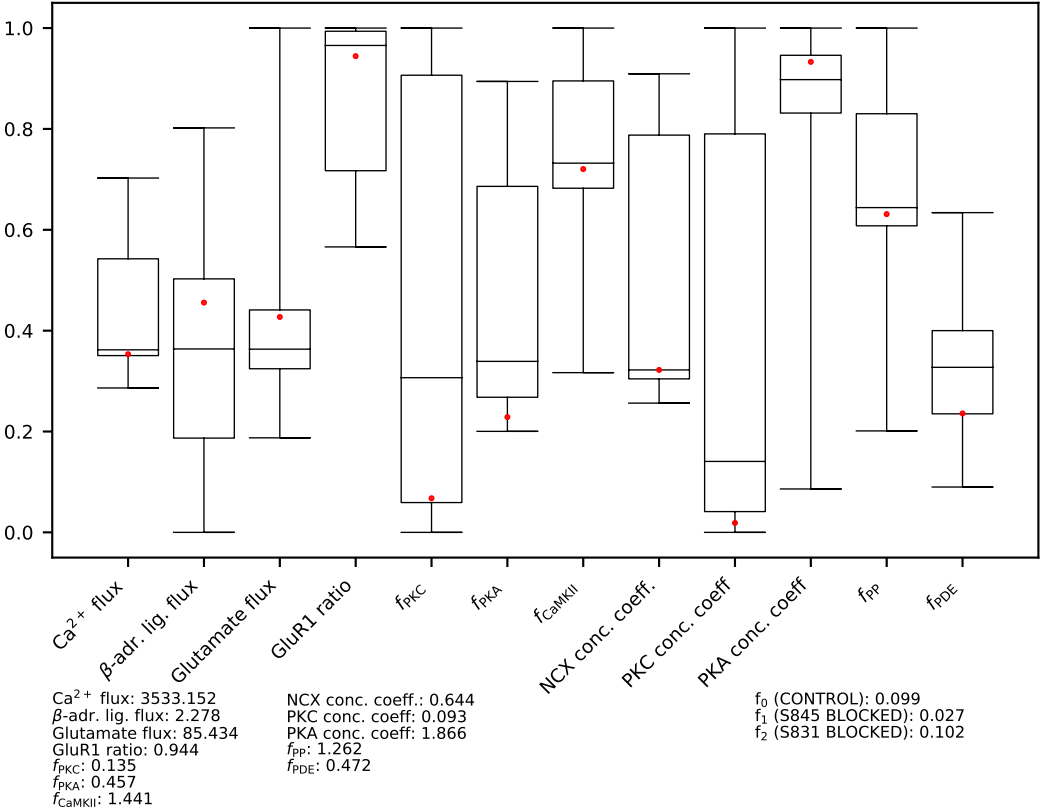

Supplement: supp [file elife_poa_e55714_Figure_9_figure_supplement_6.pdf › elife_poa_e55714_Figure_9_figure_supplement_6.pdf]

Data set VC-1, Kirkwood et al. 1997 (adult), 242 parameter sets

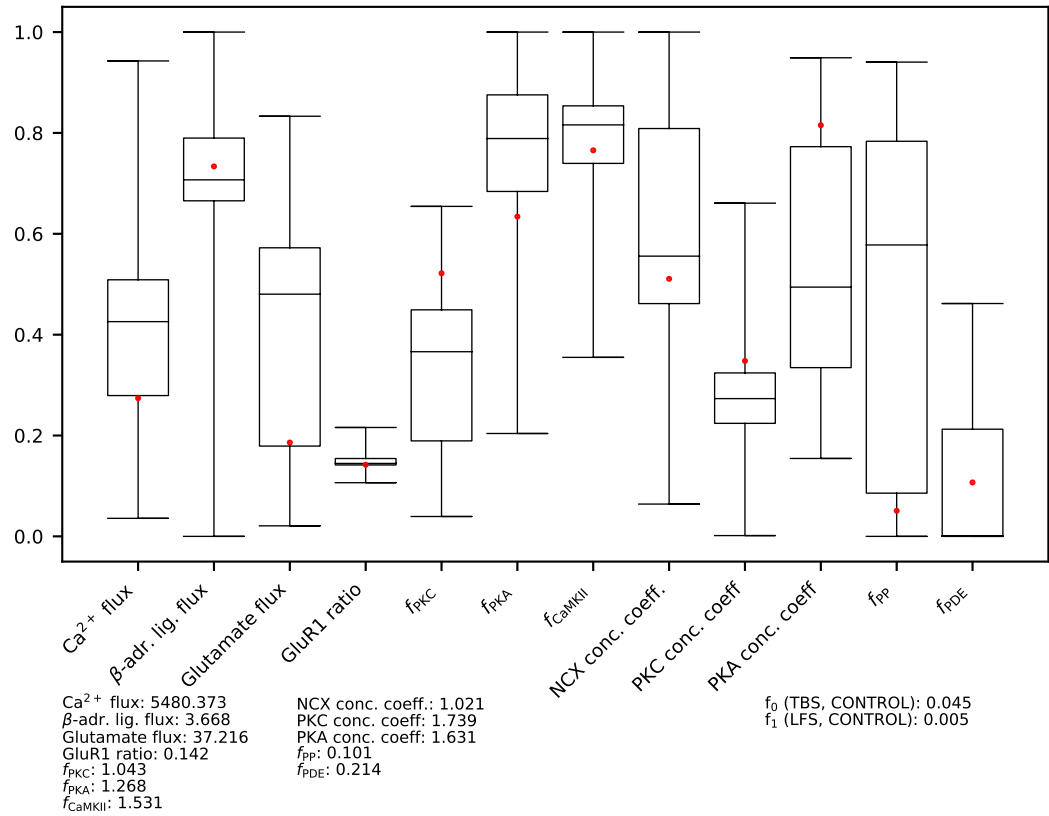

Supplement: supp [file elife_poa_e55714_Figure_9_figure_supplement_8.pdf › elife_poa_e55714_Figure_9_figure_supplement_8.pdf]

Data set VC-2, Kirkwood et al. 1997 (4-5 weeks), 199 parameter set

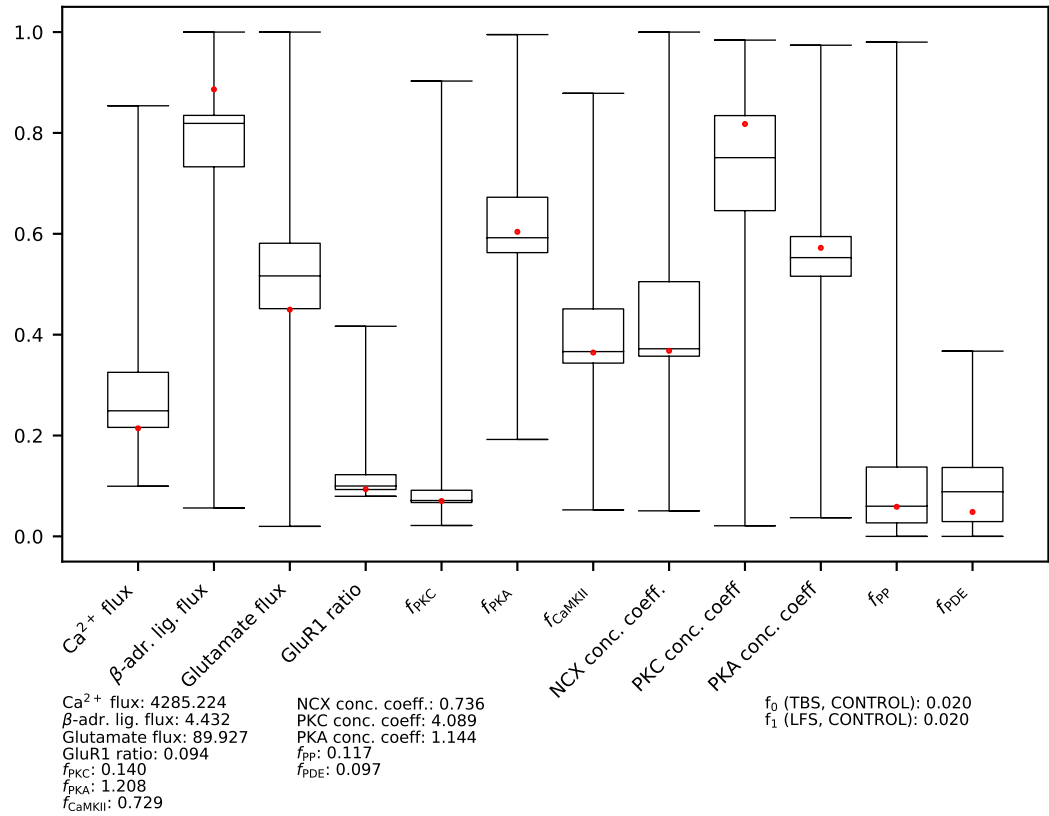

Supplement: supp [file elife_poa_e55714_Figure_9_figure_supplement_9.pdf › elife_poa_e55714_Figure_9_figure_supplement_9.pdf]
